# Supplementary material
Source: PubMed Central journal article supplement (PMC2761835)
Supplement: NIHMS132913-supplement-Tables.pdf [file NIHMS132913-supplement-Tables.pdf]

Supplementary Table S1. Clinical and demographics information of patient samples.

| Sample ID | Age (yrs) | Gender | Tobacco usage* | Histological dx† | TNM stage‡<br>NA=not applicable for dysplasia or not available for SCC | Anatomic site in oral cavity | Time to progression for low-grade lesions (months) |
|-----------|-----------|--------|----------------|------------------|------------------------------------------------------------------------|------------------------------|----------------------------------------------------|
| Oral47    | 67        | M      | NS             | HN               | NA                                                                     | Tongue                       | 10                                                 |
| Oral48    | 77        | F      | FS             | Mod Dys          | NA                                                                     | Tongue                       | 39                                                 |
| Oral50    | 74        | F      | NS             | Mild Dys         | NA                                                                     | Tongue                       | 31                                                 |
| Oral52    | 55        | F      | FS             | VH               | NA                                                                     | Gingiva                      | 26                                                 |
| Oral53    | 40        | F      | NS             | Mod Dys          | NA                                                                     | Tongue                       | 58                                                 |
| Oral54    | 40        | F      | NS             | Mod Dys          | NA                                                                     | Tongue                       | 14                                                 |
| Oral55    | 39        | F      | NS             | Mod Dys          | NA                                                                     | Tongue                       | 60                                                 |
| Oral1     | 76        | M      | FS             | Sev Dys          | NA                                                                     | Soft palate                  | -                                                  |
| Oral2     | 82        | F      | NS             | CIS              | 0                                                                      | Tongue                       | -                                                  |
| Oral3     | 57        | M      | S              | CIS              | 0                                                                      | Floor of mouth               | -                                                  |
| Oral4     | 57        | F      | FS             | CIS              | 0                                                                      | Tongue                       | -                                                  |
| Oral5     | 71        | F      | NA             | Sev Dys          | NA                                                                     | Tongue                       | -                                                  |
| Oral6     | 73        | F      | NA             | Sev Dys          | NA                                                                     | Mandibular ridge             | -                                                  |
| Oral7**   | 67        | M      | S              | Sev Dys          | NA                                                                     | Lip                          | -                                                  |
| Oral8     | 65        | F      | FS             | Sev Dys          | NA                                                                     | Tongue                       | -                                                  |
| Oral9     | 46        | F      | S              | CIS              | 0                                                                      | Tongue                       | -                                                  |
| Oral10    | 49        | M      | NS             | Sev Dys          | NA                                                                     | Tongue                       | -                                                  |
| Oral11    | 72        | M      | S              | CIS              | 0                                                                      | Soft palate                  | -                                                  |
| Oral12    | 77        | F      | NS             | CIS              | 0                                                                      | Tongue                       | -                                                  |
| Oral13    | 64        | F      | FS             | Sev Dys          | NA                                                                     | Palate                       | -                                                  |
| Oral14    | 72        | F      | S              | CIS              | 0                                                                      | Tongue                       | -                                                  |
| Oral15    | 71        | F      | NA             | Sev Dys          | NA                                                                     | Tongue                       | -                                                  |
| Oral16    | 50        | F      | NA             | Sev Dys          | NA                                                                     | Floor of mouth               | -                                                  |
| Oral17    | 78        | M      | NA             | Sev Dys          | NA                                                                     | Palate                       | -                                                  |
| Oral18    | 58        | M      | S              | Sev Dys          | NA                                                                     | Tongue                       | -                                                  |
| Oral19    | 63        | F      | NS             | CIS              | 0                                                                      | Gingiva                      | -                                                  |
| Oral20    | 44        | F      | NS             | CIS              | 0                                                                      | Tongue                       | -                                                  |
| Oral21    | 44        | F      | NS             | CIS              | 0                                                                      | Tongue                       | -                                                  |
| Oral22    | 67        | M      | FS             | CIS              | 0                                                                      | Palate                       | -                                                  |
| Oral23    | 62        | M      | S              | CIS              | 0                                                                      | Tongue                       | -                                                  |
| Oral24    | 68        | F      | S              | Sev Dys          | NA                                                                     | Floor of mouth               | -                                                  |
| Oral25    | 67        | M      | FS             | Sev Dys          | NA                                                                     | Tongue                       | -                                                  |
| Oral26    | 48        | M      | S              | Sev Dys          | NA                                                                     | Tongue                       | -                                                  |
| Oral29    | 74        | M      | FS             | CIS              | 0                                                                      | Floor of mouth               | -                                                  |

|        |    |   |    |          |    |                   |                           |
|--------|----|---|----|----------|----|-------------------|---------------------------|
| Oral30 | 58 | F | FS | CIS      | 0  | Tongue            | -                         |
| Oral31 | 86 | M | FS | CIS      | 0  | Tongue            | -                         |
| Oral32 | 66 | M | NS | CIS      | 0  | Tongue            | -                         |
| Oral33 | 52 | M | S  | CIS      | 0  | Tongue            | -                         |
| Oral34 | 58 | M | NA | CIS      | 0  | Floor of mouth    | -                         |
| Oral35 | 57 | F | NA | CIS      | 0  | Floor of mouth    | -                         |
| Oral37 | 56 | M | FS | CIS      | 0  | Tongue            | -                         |
| Oral38 | 51 | F | NS | Sev Dys  | NA | Tongue            | -                         |
| Oral40 | 63 | M | NA | Sev Dys  | NA | Floor of mouth    | -                         |
| Oral41 | 60 | M | S  | Sev Dys  | NA | Tongue            | -                         |
| Oral42 | 60 | F | S  | CIS      | 0  | Tongue            | -                         |
| Oral43 | 62 | M | S  | Sev Dys  | NA | Floor of mouth    | -                         |
| Oral44 | 46 | F | NS | Sev Dys  | NA | Tongue            | -                         |
| Oral45 | 73 | F | FS | Sev Dys  | NA | Tongue            | -                         |
| Oral46 | 43 | M | S  | Sev Dys  | NA | Sublingual mucosa | -                         |
| Oral68 | 38 | F | NA | Sev Dys  | NA | Tongue            | -                         |
| Oral56 | 75 | F | NA | Mod Dys  | NA | Vestibule         | Never progress since 1995 |
| Oral58 | 60 | F | NS | VH       | NA | Gingiva           | Never progress since 2000 |
| Oral59 | 63 | F | NS | Mild Dys | NA | Tongue            | Never progress since 1999 |
| Oral60 | 42 | M | NS | Mod Dys  | NA | Buccal            | Never progress since 1995 |
| Oral61 | 44 | M | FS | Mild Dys | NA | Palate            | Never progress since 2000 |
| Oral62 | 55 | M | FS | Mod Dys  | NA | Tongue            | Never progress since 2000 |
| Oral63 | 71 | F | FS | Mod Dys  | NA | Tongue            | Never progress since 2000 |
| Oral64 | 40 | F | S  | Mod Dys  | NA | Floor of mouth    | Never progress since 2000 |
| Oral65 | 65 | M | FS | Mod Dys  | NA | Soft palate       | Never progress since 2000 |
| Oral66 | 66 | M | S  | Mod Dys  | NA | Gingiva           | Never progress since 2000 |
| Oral67 | 61 | F | FS | Mod Dys  | NA | Tongue            | Never progress since 2001 |
| Oral69 | 71 | F | FS | Mild Dys | NA | Floor of mouth    | Never progress since 2003 |
| Oral70 | 52 | F | NS | Mild Dys | NA | Gingiva           | Never progress since 2002 |
| Oral71 | 50 | F | FS | Mod Dys  | NA | Buccal            | Never progress since 2003 |
| Oral72 | 35 | M | NS | SCC      | 1  | Tongue            | -                         |

|          |    |   |    |     |    |                                                 |   |
|----------|----|---|----|-----|----|-------------------------------------------------|---|
| Oral73   | 64 | M | S  | SCC | 2  | Tongue                                          | - |
| Oral74   | 74 | F | NS | SCC | 4A | Vestibule                                       | - |
| Oral75   | 47 | M | NA | SCC | 2  | Tongue & Floor<br>of mouth                      | - |
| Oral76   | 78 | M | NS | SCC | 1  | Lower lip                                       | - |
| Oral77   | 73 | F | FS | SCC | 4A | Gingiva                                         | - |
| Oral78   | 47 | M | S  | SCC | NA | Floor of mouth                                  | - |
| Oral79   | 74 | M | NS | SCC | 4A | Mandible                                        | - |
| Oral80** | 67 | M | S  | SCC | 3  | Tongue                                          | - |
| Oral81   | 46 | M | S  | SCC | 2  | Soft palate                                     | - |
| Oral82   | 42 | M | NS | SCC | 4A | Tongue                                          | - |
| Oral83   | 55 | M | FS | SCC | 4A | Hard palate                                     | - |
| Oral84   | 43 | M | NA | SCC | 1  | Tongue                                          | - |
| Oral85   | 65 | M | S  | SCC | 3  | Tongue                                          | - |
| Oral86   | 59 | M | NS | SCC | 3  | Tonsillar pillar                                | - |
| Oral87   | 79 | F | NA | SCC | 3  | FOM,<br>mandibular &<br>submandibular<br>glands | - |
| Oral88   | 27 | M | NS | SCC | 1  | Tongue                                          | - |
| Oral89   | 44 | M | NA | SCC | NA | Tongue                                          | - |
| Oral90   | 81 | M | S  | SCC | 2  | Tongue                                          | - |
| Oral91   | 68 | F | NS | SCC | 1  | Tongue                                          | - |
| Oral92   | 61 | M | S  | SCC | 2  | Tongue                                          | - |
| Oral93   | 40 | M | FS | SCC | 4  | Tonsil                                          | - |
| Oral94   | 33 | M | NA | SCC | 1  | Tongue                                          | - |

\*Tobacco usage: S=current smoker; FS=former smoker; NS=never smoked; NA=not available.

†Histological dx: HN, hyperplasia; VH, verrucous hyperplasia; Mild Dys, mild dysplasia; Mod dys, moderate dysplasia; CIS, carcinoma *in situ*; SCC, squamous cell carcinoma.

‡TNM, tumor-node-metastasis

\*\* Samples Oral7 and Oral80 are from the same patient.

Supplementary Table S2. Public head and neck cancer and oral cancer datasets used in expression analysis of amplified genes.

| Oncomine study name                              | Array Type                                  | Sample N (SCC) | Sample N (normal)                      | Journal                  | Reference                      |
|--------------------------------------------------|---------------------------------------------|----------------|----------------------------------------|--------------------------|--------------------------------|
| Ginos_Head-Neck                                  | Affymetrix Human Genome U133A Array         | 41 HNSCC       | 13 normal oral mucosa                  | Cancer Res.              | Ginos, MA <i>et al.</i> 2004   |
| Pyeon_Multi-cancer                               | Affymetrix Human Genome U133 Plus 2.0 Array | 42 HNSCC       | 14 normal                              | Cancer Res.              | Pyeon, D <i>et al.</i> 2007    |
| Cromer_head-neck                                 | Affymetrix, Human Genome U95A/Av2 Array     | 34 HNSCC       | 4 normal uvula                         | Oncogene                 | Cromer, A <i>et al.</i> 2004   |
| Chung_Head-Neck                                  | Agilent Human 1 cDNA microarray             | 55 HNSCC       | 3 normal tonsil                        | Cancer Cell              | Chung, CH <i>et al.</i> 2004   |
| Toruner_Head-Neck                                | Affymetrix Human Genome U133A Array         | 16 OSCC        | 4 normal oral squamous cell epithelium | Cancer Genet. Cytogenet. | Toruner, GA <i>et al.</i> 2004 |
| GEO accession for oral cancer-specific datasets: | Array Type                                  | Sample N (SCC) | Sample N (normal)                      | Journal                  | Reference                      |
| GSE10121                                         | Operon Human Genome Oligo Set v4.0          | 35 OSCCs       | 6 oral mucosa                          | -                        | -                              |
| GSE9844                                          | Affymetrix Human Genome U133 Plus 2.0 Array | 26 tongue SCC  | 12 normal                              | BMC Genomics             | Ye, H <i>et al.</i> 2008       |

Supplementary Table S3. Regions of gene amplification and homozygous deletion identified in OSCCs.

| Sample | Chromosome | BP start  | BP end    | Size (Mb) | Amplification/deletion |
|--------|------------|-----------|-----------|-----------|------------------------|
| Oral80 | 1          | 1664960   | 4121175   | 2.46      | Amplification          |
| Oral80 | 1          | 8137673   | 11057241  | 2.92      | Amplification          |
| Oral80 | 1          | 41363680  | 44254683  | 2.89      | Amplification          |
| Oral86 | 1          | 119383214 | 120039269 | 0.66      | Amplification          |
| Oral80 | 1          | 180681326 | 181362117 | 0.68      | Amplification          |
| Oral86 | 2          | 119406048 | 124375506 | 4.97      | Amplification          |
| Oral80 | 2          | 120606592 | 122213759 | 1.61      | Amplification          |
| Oral79 | 2          | 174017812 | 174508955 | 0.49      | Amplification          |
| Oral79 | 3          | 66951289  | 68455957  | 1.50      | Amplification          |
| Oral86 | 3          | 149968605 | 150998752 | 1.03      | Amplification          |
| Oral80 | 3          | 172915439 | 173631614 | 0.72      | Amplification          |
| Oral86 | 3          | 182476185 | 185427054 | 2.95      | Amplification          |
| Oral80 | 3          | 190327158 | 191835524 | 1.51      | Amplification          |
| Oral74 | 5          | 197527    | 1562881   | 1.37      | Amplification          |
| Oral79 | 6          | 41836818  | 42444246  | 0.61      | Amplification          |
| Oral79 | 7          | 52712918  | 56463747  | 3.75      | Amplification          |
| Oral75 | 7          | 53679954  | 57838439  | 4.16      | Amplification          |
| Oral85 | 7          | 54211661  | 55296490  | 1.08      | Amplification          |
| Oral75 | 7          | 62196113  | 62981658  | 0.79      | Amplification          |
| Oral83 | 7          | 99680294  | 101581563 | 1.90      | Amplification          |
| Oral80 | 7          | 154155214 | 155739542 | 1.58      | Amplification          |
| Oral77 | 8          | 102005665 | 102360864 | 0.36      | Amplification          |
| Oral77 | 8          | 101234578 | 101749095 | 0.51      | Amplification          |
| Oral77 | 8          | 103996539 | 104419139 | 0.42      | Amplification          |
| Oral90 | 8          | 133156891 | 136544201 | 3.39      | Amplification          |
| Oral86 | 8          | 142097444 | 142685278 | 0.59      | Amplification          |
| Oral88 | 9          | 13674530  | 14761740  | 1.09      | Deletion               |
| Oral88 | 9          | 21201965  | 22290129  | 1.09      | Deletion               |
| Oral75 | 10         | 168166    | 908109    | 0.74      | Amplification          |
| Oral80 | 10         | 2888173   | 6478711   | 3.59      | Amplification          |
| Oral72 | 11         | 34449322  | 36985885  | 2.54      | Amplification          |
| Oral83 | 11         | 44527648  | 47208523  | 2.68      | Amplification          |
| Oral81 | 11         | 55802749  | 57008121  | 1.21      | Amplification          |
| Oral87 | 11         | 65790600  | 71745403  | 5.95      | Amplification          |
| Oral88 | 11         | 68042959  | 72374541  | 4.33      | Amplification          |
| Oral80 | 11         | 68149145  | 71048199  | 2.90      | Amplification          |
| Oral83 | 11         | 68311392  | 72374541  | 4.06      | Amplification          |
| Oral74 | 11         | 68463939  | 69118628  | 0.65      | Amplification          |

|        |    |           |           |      |               |
|--------|----|-----------|-----------|------|---------------|
| Oral81 | 11 | 68463939  | 70379067  | 1.92 | Amplification |
| Oral74 | 11 | 101123144 | 103852820 | 2.73 | Amplification |
| Oral89 | 11 | 101247709 | 103852820 | 2.61 | Amplification |
| Oral88 | 12 | 68957524  | 70047717  | 1.09 | Amplification |
| Oral75 | 17 | 33865615  | 35694425  | 1.83 | Amplification |
| Oral75 | 18 | 14045377  | 14975939  | 0.93 | Amplification |
| Oral84 | 18 | 17484636  | 19164296  | 1.68 | Amplification |
| Oral80 | 19 | 42534250  | 44786412  | 2.25 | Amplification |
| Oral79 | 20 | 30235601  | 32173390  | 1.94 | Amplification |
| Oral75 | 22 | 35308342  | 38605066  | 3.30 | Amplification |

Supplementary Table S4. RefSeq genes mapped within regions of homozygous deletions.

| RefSeq genes   | Chromosome location |
|----------------|---------------------|
| BNC2           | 9p22.3              |
| ASTN2          | 9q33.1              |
| TLR4           | 9q33.1              |
| C9orf82        | 9p21.1.-p21.2       |
| PLAA           | 9p21.1.-p21.2       |
| IFT74          | 9p21.1.-p21.2       |
| LRRC19         | 9p21.1.-p21.2       |
| TEK            | 9p21.1.-p21.2       |
| C9orf11        | 9p21.1.-p21.2       |
| MOBKL2B        | 9p21.1.-p21.2       |
| IFNK           | 9p21.1.-p21.2       |
| C9orf72        | 9p21.1.-p21.2       |
| LINGO2         | 9p21.1.-p21.2       |
| NFIB           | 9p22.3-p23          |
| ZDHHC21        | 9p22.3-p23          |
| CER1           | 9p22.3-p23          |
| FREM1          | 9p22.3-p23          |
| IFNA14         | 9p21.3              |
| IFNA16         | 9p21.3              |
| IFNA17         | 9p21.3              |
| IFNA5          | 9p21.3              |
| IFNA6          | 9p21.3              |
| KLHL9          | 9p21.3              |
| IFNA13         | 9p21.3              |
| IFNA2          | 9p21.3              |
| IFNA8          | 9p21.3              |
| IFNA1          | 9p21.3              |
| IFNE1          | 9p21.3              |
| MTAP           | 9p21.3              |
| CDKN2A         | 9p21.3              |
| CDKN2B         | 9p21.3              |
| MGA            | 15q15.1             |
| MAPKBP1        | 15q15.1             |
| JMJD7-PLAG2G4B | 15q15.1             |
| JMJD7          | 15q15.1             |
| SPTBN5         | 15q15.1             |
| EHD4           | 15q15.1             |
| PLA2G4E        | 15q15.1             |
| PLA2G4D        | 15q15.1             |
| PLA2G4F        | 15q15.1             |

|         |         |
|---------|---------|
| VPS39   | 15q15.1 |
| TMEM87A | 15q15.1 |
| GANC    | 15q15.1 |
| CAPN3   | 15q15.1 |
| WVOX    | 16q23.1 |



Supplementary Table S5. Functions of cancer-related genes within recurrent regions of amplification as determined by IPA Functional Analysis.

| Category | Function                                      | Function Annotation                                  | P-value  | Molecules                        | # Molecules |
|----------|-----------------------------------------------|------------------------------------------------------|----------|----------------------------------|-------------|
| Cancer   | von Hippel-Lindau syndrome                    | von Hippel-Lindau syndrome                           | 1.31E-05 | CCND1, EGFR, KDR                 | 3           |
| Cancer   | giant cell glioblastoma                       | giant cell glioblastoma                              | 4.75E-05 | EGFR, KDR                        | 2           |
| Cancer   | chemotaxis                                    | chemotaxis of tumor cell lines                       | 8.64E-05 | CCL19, CCL21, CCL27, CREB3, EGFR | 5           |
| Cancer   | homing                                        | homing of tumor cell lines                           | 1.06E-04 | CCL19, CCL21, CCL27, CREB3, EGFR | 5           |
| Cancer   | gliosarcoma                                   | gliosarcoma                                          | 2.36E-04 | EGFR, KDR                        | 2           |
| Cancer   | cell cycle progression                        | cell cycle progression of brain cancer cell lines    | 1.02E-03 | CCND1, EGFR                      | 2           |
| Cancer   | G2 phase                                      | arrest in G2 phase of breast cancer cell lines       | 1.20E-03 | CCND1, EGFR                      | 2           |
| Cancer   | pituitary gland tumor                         | pituitary gland tumor                                | 1.40E-03 | CCND1, EGFR                      | 2           |
| Cancer   | renal tumor                                   | renal tumor                                          | 1.57E-03 | CA9, CCND1, EGFR, KDR            | 4           |
| Cancer   | pituitary cancer                              | pituitary cancer                                     | 1.61E-03 | CCND1, EGFR                      | 2           |
| Cancer   | hyperplasia                                   | hyperplasia of mammary gland                         | 1.84E-03 | CCND1, FGF3                      | 2           |
| Cancer   | invasion                                      | invasion of breast cell lines                        | 1.84E-03 | EGFR, FGF4                       | 2           |
| Cancer   | cell death                                    | cell death of tumor cells                            | 1.87E-03 | CCL27, EGFR, KDR, RECK, SNAI2    | 5           |
| Cancer   | autosomal recessive polycystic kidney disease | autosomal recessive polycystic kidney disease        | 2.08E-03 | CCND1, EGFR                      | 2           |
| Cancer   | cell movement                                 | cell movement of tumor cell lines                    | 2.18E-03 | CCL19, CCL21, CCL27, CREB3, EGFR | 5           |
| Cancer   | cell cycle progression                        | arrest in cell cycle progression of tumor cell lines | 2.45E-03 | CCND1, EGFR, GAL                 | 3           |
| Cancer   | hyperplasia                                   | hyperplasia of exocrine gland                        | 2.60E-03 | CCND1, FGF3                      | 2           |
| Cancer   | small cell lung carcinoma                     | small cell lung carcinoma                            | 2.60E-03 | EGFR, KDR                        | 2           |
| Cancer   | G2 phase                                      | G2 phase of breast cancer cell lines                 | 2.88E-03 | CCND1, EGFR                      | 2           |

|        |                             |                                                          |          |                        |   |
|--------|-----------------------------|----------------------------------------------------------|----------|------------------------|---|
| Cancer | proliferation               | proliferation of squamous cell carcinoma cell lines      | 3.18E-03 | CCND1, EGFR            | 2 |
| Cancer | tumorigenesis               | tumorigenesis of mammary gland                           | 3.48E-03 | CCND1, FGF3            | 2 |
| Cancer | apoptosis                   | apoptosis of squamous cell carcinoma cell lines          | 3.81E-03 | CCND1, EGFR            | 2 |
| Cancer | peritoneal tumor            | peritoneal tumor                                         | 3.81E-03 | EGFR, KDR              | 2 |
| Cancer | development                 | development of malignant tumor                           | 3.91E-03 | CCND1, EGFR, SNAI2     | 3 |
| Cancer | cell cycle progression      | cell cycle progression of prostatic adenocarcinoma cells | 4.03E-03 | CCND1                  | 1 |
| Cancer | hyperplasia                 | hyperplasia of ampullary gland                           | 4.03E-03 | FGF3                   | 1 |
| Cancer | hyperplasia                 | hyperplasia of prostatic lobe                            | 4.03E-03 | FGF3                   | 1 |
| Cancer | proliferation               | proliferation of squamous carcinoma cells                | 4.03E-03 | EGFR                   | 1 |
| Cancer | development                 | development of mesenchymal tumor                         | 4.03E-03 | SNAI2                  | 1 |
| Cancer | development                 | development of oligoastrocytoma                          | 4.03E-03 | EGFR                   | 1 |
| Cancer | development                 | development of oligodendroglioma                         | 4.03E-03 | EGFR                   | 1 |
| Cancer | S phase                     | entry into S phase of melanoma cell lines                | 4.03E-03 | CCND1                  | 1 |
| Cancer | adhesion                    | adhesion of ovarian cancer cell lines                    | 4.03E-03 | EGFR                   | 1 |
| Cancer | adhesion                    | adhesion of squamous carcinoma cells                     | 4.03E-03 | EGFR                   | 1 |
| Cancer | growth                      | delay in growth of breast cancer cell lines              | 4.03E-03 | CA9                    | 1 |
| Cancer | interstitial fluid pressure | interstitial fluid pressure of tumor tissue              | 4.03E-03 | KDR                    | 1 |
| Cancer | morphology                  | morphology of squamous carcinoma cells                   | 4.03E-03 | EGFR                   | 1 |
| Cancer | sub-G1 phase                | sub-G1 phase of colorectal cancer cell lines             | 4.03E-03 | EGFR                   | 1 |
| Cancer | carcinoid tumor             | carcinoid tumor                                          | 4.14E-03 | EGFR, KDR              | 2 |
| Cancer | growth                      | growth of breast cancer cell lines                       | 4.19E-03 | CA9, CCND1, EGFR, FGF4 | 4 |
| Cancer | cell death                  | cell death of squamous cell carcinoma cell lines         | 4.49E-03 | CCND1, EGFR            | 2 |
| Cancer | growth                      | growth of colorectal cancer cell lines                   | 4.49E-03 | CCND1, EGFR, KDR       | 3 |
| Cancer | developmental process       | developmental process of breast cancer cell lines        | 4.57E-03 | CA9, CCND1, EGFR, FGF4 | 4 |
| Cancer | development                 | development of primary tumor                             | 4.96E-03 | CCND1, EGFR, SNAI2     | 3 |
| Cancer | developmental process       | developmental process of colorectal cancer cell lines    | 5.12E-03 | CCND1, EGFR, KDR       | 3 |
| Cancer | hyperplasia                 | hyperplasia of secretory structure                       | 5.23E-03 | CCND1, FGF3            | 2 |

|        |                           |                                                         |          |                                       |   |
|--------|---------------------------|---------------------------------------------------------|----------|---------------------------------------|---|
| Cancer | proliferation             | proliferation of neuroblastoma cell lines               | 5.23E-03 | CCND1, GAL                            | 2 |
| Cancer | small cell lung cancer    | small cell lung cancer                                  | 5.61E-03 | EGFR, GAL                             | 2 |
| Cancer | differentiation           | differentiation of neuroblastoma cell lines             | 6.01E-03 | CCND1, EGFR                           | 2 |
| Cancer | polycystic kidney disease | polycystic kidney disease                               | 6.01E-03 | CCND1, EGFR                           | 2 |
| Cancer | invasion                  | invasion of eukaryotic cells                            | 6.31E-03 | CCL19, CCL21, CCND1, EGFR, FGF4, RECK | 6 |
| Cancer | cell division process     | cell division process of brain cancer cell lines        | 6.43E-03 | CCND1, EGFR                           | 2 |
| Cancer | invasion                  | invasion of carcinoma cell lines                        | 6.85E-03 | CCL21, RECK                           | 2 |
| Cancer | thyroid carcinoma         | thyroid carcinoma                                       | 6.85E-03 | EGFR, KDR                             | 2 |
| Cancer | apoptosis                 | apoptosis of tumor cells                                | 7.16E-03 | CCL27, EGFR, KDR, SNAI2               | 4 |
| Cancer | invasion                  | invasion of cells                                       | 7.88E-03 | CCL19, CCL21, CCND1, EGFR, FGF4, RECK | 6 |
| Cancer | esophageal cancer         | esophageal cancer                                       | 7.96E-03 | CCND1, EGFR, KDR                      | 3 |
| Cancer | chemotaxis                | chemotaxis of squamous cell carcinoma cell lines        | 8.04E-03 | CCL19                                 | 1 |
| Cancer | homing                    | homing of squamous cell carcinoma cell lines            | 8.04E-03 | CCL19                                 | 1 |
| Cancer | cell cycle progression    | arrest in cell cycle progression of rhabdoid cell lines | 8.04E-03 | CCND1                                 | 1 |
| Cancer | cell cycle progression    | cell cycle progression of carcinoma cells               | 8.04E-03 | CCND1                                 | 1 |
| Cancer | cell cycle progression    | cell cycle progression of prostate cancer cells         | 8.04E-03 | CCND1                                 | 1 |
| Cancer | tumorigenesis             | delay in tumorigenesis of kidney cancer cell lines      | 8.04E-03 | EGFR                                  | 1 |
| Cancer | tumorigenesis             | tumorigenesis of embryonic cell lines                   | 8.04E-03 | EGFR                                  | 1 |
| Cancer | tumorigenesis             | tumorigenesis of gonadal cell lines                     | 8.04E-03 | FGF3                                  | 1 |
| Cancer | development               | development of astrocytoma                              | 8.04E-03 | EGFR                                  | 1 |
| Cancer | development               | development of rhabdoid tumor                           | 8.04E-03 | CCND1                                 | 1 |
| Cancer | S phase                   | S phase of melanoma cell lines                          | 8.04E-03 | CCND1                                 | 1 |

|        |                        |                                                            |          |       |   |
|--------|------------------------|------------------------------------------------------------|----------|-------|---|
| Cancer | morphology             | morphology of carcinoma cells                              | 8.04E-03 | EGFR  | 1 |
| Cancer | cell division process  | cell division process of prostate cancer cells             | 8.04E-03 | CCND1 | 1 |
| Cancer | esophageal cancer      | esophageal cancer of mammalia                              | 8.04E-03 | CCND1 | 1 |
| Cancer | esophageal cancer      | esophageal cancer of mice                                  | 8.04E-03 | CCND1 | 1 |
| Cancer | esophageal cancer      | esophageal cancer of rodents                               | 8.04E-03 | CCND1 | 1 |
| Cancer | G0/G1 phase transition | arrest in G0/G1 phase transition of rhabdoid cell lines    | 8.04E-03 | CCND1 | 1 |
| Cancer | G1 phase               | arrest in G1 phase of neuroblastoma cell lines             | 8.04E-03 | CCND1 | 1 |
| Cancer | G1 phase               | arrest in G1 phase of squamous cell carcinoma cell lines   | 8.04E-03 | EGFR  | 1 |
| Cancer | accumulation           | accumulation of colon carcinoma cells                      | 8.04E-03 | CCND1 | 1 |
| Cancer | accumulation           | accumulation of skin cancer cell lines                     | 8.04E-03 | CCND1 | 1 |
| Cancer | area                   | area of tumor                                              | 8.04E-03 | KDR   | 1 |
| Cancer | cell spreading         | cell spreading of bladder cancer cell lines                | 8.04E-03 | SNAI2 | 1 |
| Cancer | colony survival        | colony survival of breast cancer cell lines                | 8.04E-03 | CA9   | 1 |
| Cancer | interphase             | interphase of rhabdoid cell lines                          | 8.04E-03 | CCND1 | 1 |
| Cancer | mesenchymal tumor      | mesenchymal tumor                                          | 8.04E-03 | SNAI2 | 1 |
| Cancer | mitogenesis            | mitogenesis of colon cancer cell lines                     | 8.04E-03 | EGFR  | 1 |
| Cancer | oral cancer            | oral cancer of mice                                        | 8.04E-03 | CCND1 | 1 |
| Cancer | outgrowth              | outgrowth of ovarian cancer cell lines                     | 8.04E-03 | CCND1 | 1 |
| Cancer | permeability           | permeability of endothelioma cell lines                    | 8.04E-03 | KDR   | 1 |
| Cancer | ploidy                 | ploidy of ovarian cancer cell lines                        | 8.04E-03 | EGFR  | 1 |
| Cancer | re-epithelialization   | re-epithelialization of squamous cell carcinoma cell lines | 8.04E-03 | EGFR  | 1 |
| Cancer | remission              | remission of tumor                                         | 8.04E-03 | EGFR  | 1 |
| Cancer | rhabdoid tumor         | rhabdoid tumor                                             | 8.04E-03 | CCND1 | 1 |
| Cancer | transformation         | transformation of carcinoma cells                          | 8.04E-03 | FGF4  | 1 |

|        |                        |                                                                 |          |                    |   |
|--------|------------------------|-----------------------------------------------------------------|----------|--------------------|---|
| Cancer | transformation         | transformation of erythroblasts                                 | 8.04E-03 | EGFR               | 1 |
| Cancer | tumor burden           | tumor burden of mice                                            | 8.04E-03 | CCL21              | 1 |
| Cancer | islet cell tumor       | islet cell tumor                                                | 8.21E-03 | EGFR, KDR          | 2 |
| Cancer | renal-cell carcinoma   | renal-cell carcinoma                                            | 9.78E-03 | CA9, EGFR, KDR     | 3 |
| Cancer | development            | development of tumor                                            | 1.00E-02 | CCND1, EGFR, SNAI2 | 3 |
| Cancer | benign nerve tumor     | benign nerve tumor                                              | 1.02E-02 | GAL, KDR           | 2 |
| Cancer | developmental process  | developmental process of malignant tumor                        | 1.05E-02 | CCND1, EGFR, SNAI2 | 3 |
| Cancer | small-cell carcinoma   | small-cell carcinoma                                            | 1.07E-02 | EGFR, KDR          | 2 |
| Cancer | interphase             | arrest in interphase of breast cancer cell lines                | 1.12E-02 | CCND1, EGFR        | 2 |
| Cancer | cell stage             | arrest in cell stage of breast cancer cell lines                | 1.12E-02 | CCND1, EGFR        | 2 |
| Cancer | chemotaxis             | chemotaxis of carcinoma cell lines                              | 1.20E-02 | CCL21              | 1 |
| Cancer | cell cycle progression | arrest in cell cycle progression of pheochromocytoma cell lines | 1.20E-02 | GAL                | 1 |
| Cancer | hyperplasia            | hyperplasia of lobules of mammary gland                         | 1.20E-02 | FGF4               | 1 |
| Cancer | hyperplasia            | hyperplasia of retina                                           | 1.20E-02 | CCND1              | 1 |
| Cancer | tumorigenesis          | delay in tumorigenesis of eukaryotic cells                      | 1.20E-02 | EGFR               | 1 |
| Cancer | tumorigenesis          | tumorigenesis of intestinal adenoma                             | 1.20E-02 | CCND1              | 1 |
| Cancer | development            | development of glioma                                           | 1.20E-02 | EGFR               | 1 |
| Cancer | development            | development of renal tumor                                      | 1.20E-02 | CCND1              | 1 |
| Cancer | adhesion               | adhesion of carcinoma cells                                     | 1.20E-02 | EGFR               | 1 |
| Cancer | growth                 | delay in growth of tumor cell lines                             | 1.20E-02 | CA9                | 1 |
| Cancer | developmental process  | developmental process of glioma                                 | 1.20E-02 | EGFR               | 1 |
| Cancer | cell division process  | cell division process of adenocarcinoma cells                   | 1.20E-02 | CCND1              | 1 |
| Cancer | G1 phase               | G1 phase of squamous cell carcinoma cell lines                  | 1.20E-02 | EGFR               | 1 |
| Cancer | transformation         | transformation of exocrine gland                                | 1.20E-02 | CCND1              | 1 |

|        |                               |                                                             |          |                                |   |
|--------|-------------------------------|-------------------------------------------------------------|----------|--------------------------------|---|
| Cancer | transformation                | transformation of intestinal cell lines                     | 1.20E-02 | EGFR                           | 1 |
| Cancer | transformation                | transformation of mammary gland                             | 1.20E-02 | CCND1                          | 1 |
| Cancer | G2/M phase transition         | arrest in G2/M phase transition of breast cancer cell lines | 1.20E-02 | CCND1                          | 1 |
| Cancer | colony formation              | colony formation of kidney cancer cell lines                | 1.20E-02 | EGFR                           | 1 |
| Cancer | regression                    | regression of adenoma                                       | 1.20E-02 | EGFR                           | 1 |
| Cancer | scattering                    | scattering of neuroblastoma cell lines                      | 1.20E-02 | EGFR                           | 1 |
| Cancer | size                          | size of adenoma                                             | 1.20E-02 | EGFR                           | 1 |
| Cancer | glioblastoma                  | glioblastoma                                                | 1.23E-02 | EGFR, KDR                      | 2 |
| Cancer | invasion                      | invasion of cell lines                                      | 1.35E-02 | CCL19, CCL21, EGFR, FGF4, RECK | 5 |
| Cancer | developmental process         | developmental process of primary tumor                      | 1.35E-02 | CCND1, EGFR, SNAI2             | 3 |
| Cancer | cell spreading                | cell spreading of tumor cell lines                          | 1.41E-02 | SNAI2, TESK1                   | 2 |
| Cancer | non-small-cell lung carcinoma | non-small-cell lung carcinoma                               | 1.41E-02 | EGFR, KDR, SEC61G              | 3 |

© 2000-2008 Ingenuity Systems, Inc. All rights reserved.

Supplementary Table S6. Lists of genes identified as overexpression in public datasets.

| Genes in recurrent amplicons: | Filter by overexpression in at least one head and neck SCC datasets: | Filter by overexpression in at least one oral datasets: | Overexpressed genes in both head and neck and oral cancer datasets: |
|-------------------------------|----------------------------------------------------------------------|---------------------------------------------------------|---------------------------------------------------------------------|
| ANKRD23                       | ANKRD39                                                              | ANKRD23                                                 | ANKRD39                                                             |
| ANKRD39                       | ARID5A                                                               | ASCC3L1                                                 | ASCC3L1                                                             |
| ARID3C                        | ASCC3L1                                                              | C9orf100                                                | C9orf100                                                            |
| ARID5A                        | C9orf100                                                             | CA9                                                     | CA9                                                                 |
| ASCC3L1                       | CA9                                                                  | CCL27                                                   | CCL27                                                               |
| C9orf100                      | CCL19                                                                | CCND1                                                   | CCND1                                                               |
| C9orf127                      | CCL21                                                                | CIAO1                                                   | CIAO1                                                               |
| C9orf128                      | CCL27                                                                | CNNM3                                                   | CNNM3                                                               |
| C9orf165                      | CCND1                                                                | CNTFR                                                   | CPT1A                                                               |
| C9orf23                       | CD72                                                                 | CPT1A                                                   | CREB3                                                               |
| C9orf24                       | CEP135                                                               | CREB3                                                   | DCTN3                                                               |
| C9orf25                       | CIAO1                                                                | DCTN3                                                   | EGFR                                                                |
| CA9                           | CNNM3                                                                | EGFR                                                    | FGF3                                                                |
| CCDC107                       | CPT1A                                                                | FGF19                                                   | FLJ10081                                                            |
| CCL19                         | CREB3                                                                | FGF3                                                    | GAL                                                                 |
| CCL21                         | DCTN3                                                                | FGF4                                                    | LMAN2L                                                              |
| CCL27                         | EGFR                                                                 | FLJ10081                                                | LRP5                                                                |
| CCND1                         | FGF3                                                                 | GAL                                                     | MRPL21                                                              |
| CD72                          | FLJ10081                                                             | GBA2                                                    | NCAPH                                                               |
| CEP135                        | GAL                                                                  | IL11RA                                                  | OPRS1                                                               |
| CIAO1                         | IGHMBP2                                                              | KDR                                                     | ORAOV1                                                              |
| CLOCK                         | LMAN2L                                                               | KIAA1754L                                               | SEC61G                                                              |
| CNNM3                         | LRP5                                                                 | KIF24                                                   | SNAI2                                                               |
| CNNM4                         | MRPL21                                                               | LINCR                                                   | TESK1                                                               |
| CNTFR                         | NCAPH                                                                | LMAN2L                                                  | TMEM165                                                             |
| CPT1A                         | NUDT2                                                                | LRP5                                                    | TPCN2                                                               |
| CREB3                         | OPRS1                                                                | MRGPRD                                                  | TPM2                                                                |
| DCTN3                         | OR2S2                                                                | MRGPRF                                                  | YWHAZ                                                               |
| DNAI1                         | ORAOV1                                                               | MRPL21                                                  |                                                                     |
| EFCAB1                        | RECK                                                                 | MYEOV                                                   |                                                                     |
| EGFR                          | RGP1                                                                 | NCAPH                                                   |                                                                     |
| EXOC1                         | SEC61G                                                               | NPR2                                                    |                                                                     |
| FER1L5                        | SEMA4C                                                               | OPRS1                                                   |                                                                     |
| FGF19                         | SNAI2                                                                | ORAOV1                                                  |                                                                     |
| FGF3                          | TESK1                                                                | RUSC2                                                   |                                                                     |
| FGF4                          | TLN1                                                                 | SEC61G                                                  |                                                                     |
| FLJ10081                      | TMEM165                                                              | SIT1                                                    |                                                                     |

|           |       |         |
|-----------|-------|---------|
| GAL       | TPCN2 | SNAI2   |
| GALT      | TPM2  | TESK1   |
| GBA2      | YWHAZ | TMEM165 |
| HINT2     |       | TPCN2   |
| IGHMBP2   |       | TPM2    |
| IL11RA    |       | UBAP1   |
| KDR       |       | UBAP2   |
| KIAA1161  |       | WDR40A  |
| KIAA1754L |       | YWHAZ   |
| KIF24     |       |         |
| LGLL338   |       |         |
| LINCR     |       |         |
| LMAN2L    |       |         |
| LOC51252  |       |         |
| LOC730112 |       |         |
| LRP5      |       |         |
| MRGPRD    |       |         |
| MRGPRF    |       |         |
| MRPL21    |       |         |
| MTL5      |       |         |
| MYEOV     |       |         |
| NCAPH     |       |         |
| NMU       |       |         |
| NPR2      |       |         |
| NUDT2     |       |         |
| OPRS1     |       |         |
| OR13J1    |       |         |
| OR2S2     |       |         |
| ORAOV1    |       |         |
| PC-3      |       |         |
| PDCL2     |       |         |
| RECK      |       |         |
| RGP1      |       |         |
| RUSC2     |       |         |
| SAPS3     |       |         |
| SEC61G    |       |         |
| SEMA4C    |       |         |
| SIT1      |       |         |
| SNAI2     |       |         |
| SPAG8     |       |         |
| SRD5A2L   |       |         |
| TESK1     |       |         |
| TLN1      |       |         |



|         |
|---------|
| TMEM165 |
| TPCN2   |
| TPM2    |
| UBAP1   |
| UBAP2   |
| WDR40A  |
| YWHAZ   |
| ZNF706  |
